# Supplementary material for: A fully integrated SNP genotyping system for hereditary hearing-loss detection
Source: Royal Society of Chemistry journal article supplement (doi:10.1039/d1lc00805f), 2021-12-09
Supplement: d1lc00805f1.pdf [file d1lc00805f1.pdf]

## 1 **Supplementary information**

# 2 **A fully integrated SNP genotyping system for hereditary** 3 **hearing-loss detection**

4 Nan Li<sup>a</sup>, Yuanyue Zhang<sup>a</sup>, Minjie Shen<sup>a</sup>, and Youchun Xu<sup>a\*</sup>

5 <sup>a</sup> State Key Laboratory of Membrane Biology, Department of Biomedical Engineering, School of  
6 Medicine, Tsinghua University, Beijing 100084, China.

7 \*Correspondence should be addressed to Y.X. ([xyx2012@tsinghua.edu.cn](mailto:xyx2012@tsinghua.edu.cn)).

8 Tel: (86)-10-62796071.

### 9 **Supporting information contents:**

10 **On-cassette DNA extraction process.**

11 **Figure S1.** (A) Schematic depiction of the optical module. (B) Validation of the real-time  
12 detection ability of the dual-channel fluorescence detection system.

13 **Figure S2.** Verification of the PCR temperature control system.

14 **Figure S3.** The results of the additional sensitivity tests of the cassette system.

15 **Figure S4.** Detection results of 13 clinical samples using our cassette system.

16 **Figure S5.** Sanger sequencing results of 13 clinical samples.

17 **Table S1.** Basic information of 13 clinical samples.

18 **Table S2.** Sequences of cloning primers of 7 SNPs/InDels.

19 **Table S3.** Specificity of on-cassette tests for the detection of seven SNPs/InDels.

20 **Table S4.** Sensitivity of on-cassette tests for the detection of seven SNPs/InDels.

21 **Video S1.** Automated processing on the cassette system for SNP/InDel genotyping.

22 **On-cassette DNA extraction process.** First, when the rotary valve was switched to the lysis  
23 chamber, lysis buffer was mixed with the blood sample by the rapid liquid transfer between the  
24 lysis chamber and the syringe barrel for 20 minutes. Then, the lysed sample (800  $\mu$ L) was  
25 transferred into the binding chamber and completely mixed with ChargeSwitch Purification  
26 Buffer (200  $\mu$ L) containing ChargeSwitch Magnetic Beads for 5 minutes. Subsequently, the  
27 mixture was aspirated back into the syringe barrel and then slowly pushed into the binding  
28 chamber through the channel inside the rotary valve to collect magnetic beads in the bottom of  
29 the rotary valve using the magnet located close to the bottom of the rotary valve. After binding  
30 the DNA to magnetic beads, the rotary valve was switched to connect the inlet of the first  
31 washing chamber, with the magnet driven away from the rotary valve. Then, the syringe plunger  
32 was quickly pushed and pulled several times to resuspend and wash the magnetic beads in 500  
33  $\mu$ L of ChargeSwitch Wash Buffer for 3 minutes. After the first washing step, the magnet was  
34 pulled up again to collect the magnetic beads, and the waste buffer was discarded into the first  
35 washing chamber. The second and third washing steps followed a similar process. After the  
36 washing process, the magnet was moved away from the rotary valve, and the magnetic beads  
37 were suspended by 100  $\mu$ L of KASP Master mix for 6 minutes to elute the bound DNA.  
38 Afterwards, the mixture of DNA template and the KASP Master mix was aspirated into the  
39 syringe barrel with the magnetic beads collected again.

40

41 **Figure S1.** (A) Schematic depiction of the optical module. (B) Validation of the real-time  
42 detection ability of the dual-channel fluorescence detection system. In comparison with the  
43 Bio-Rad CFX96 qPCR instrument, LAMP reactions were used to verify the performance of  
44 real-time fluorescence detection of the processing instrument. (B1) A real-time fluorescence  
45 curve in a FAM channel was obtained by the Bio-Rad qPCR instrument. (B2) A real-time  
46 fluorescence curve in blue was obtained by the dual-channel fluorescence detection system and  
47 a fitting curve in red was obtained from the blue one. The red curve in Figure B had the same  
48 curving shape and the peaking time with the blue curve in Figure A, which proved the real-time  
49 detection ability of the dual-channel fluorescence detection system.

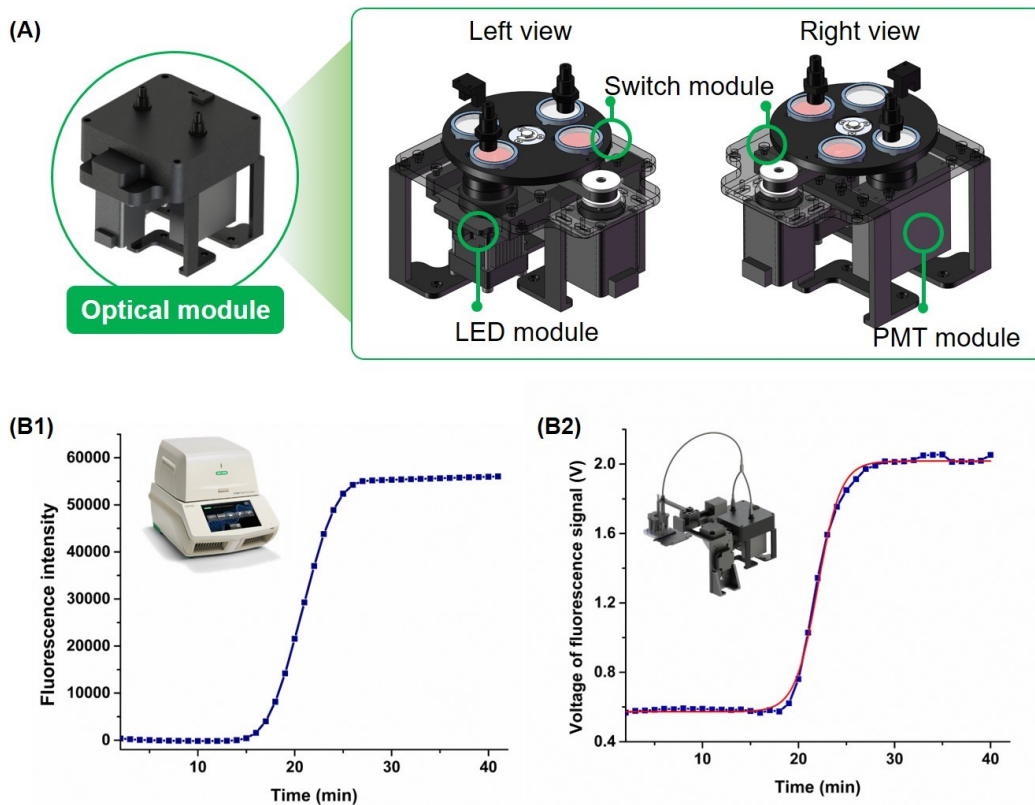

50

51 **Figure S2.** Verification of the PCR temperature control system. (A) Thermal images of the  
 52 heating plate without and with the cassette. The heating area for eight reaction chambers is  
 53 circled by a red box. (B) Thermal images of the heating plate without the cassette at 95°C. (C)  
 54 The calibration curve between the temperature of the heating plate and the temperature of the  
 55 chamber. The curve was well fitted to a linear equation with an R<sup>2</sup> equal to 0.9998. Cross-  
 56 sectional schematic of the heating plate with an inserted reaction chamber of the cassette and  
 57 two thermal sensors embedded into the chamber and the heating plate. (D) Thermal cycling  
 58 profile. The black line shows the temperature of the heating plate, and the blue dotted line is  
 59 the set temperature as a function of time. The temperature ramp rates were 2.5°C/s for heating  
 60 and 1.4°C/s for cooling. (E) FAM and HEX fluorescence signals of eight reaction chambers.  
 61 (F) Gel electrophoresis of KASP products in eight reaction chambers. (Lane M: DL2000 DNA  
 62 marker; P: Positive control; N: Negative control.)

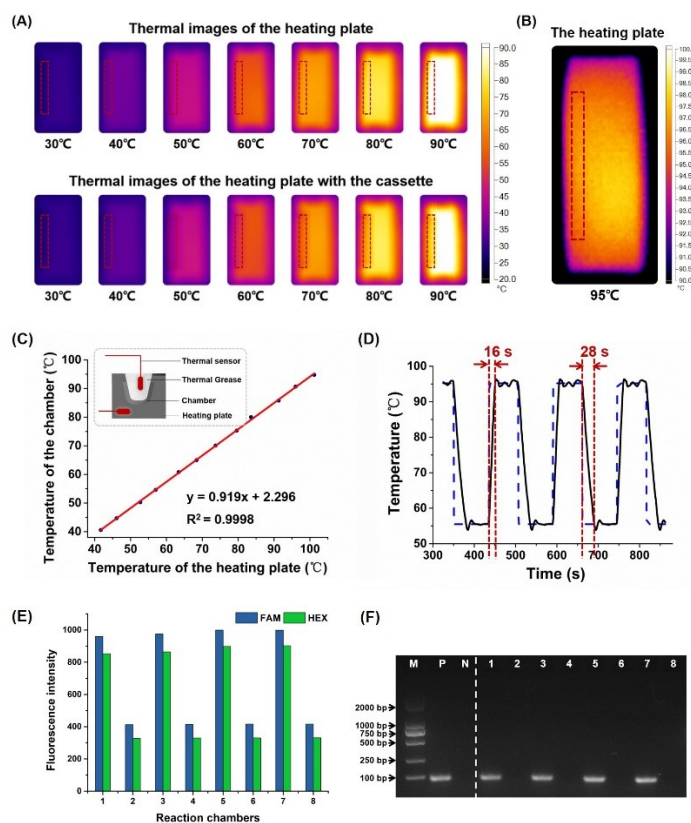

63

64 **Figure S3.** The results of the additional sensitivity tests of the cassette system.

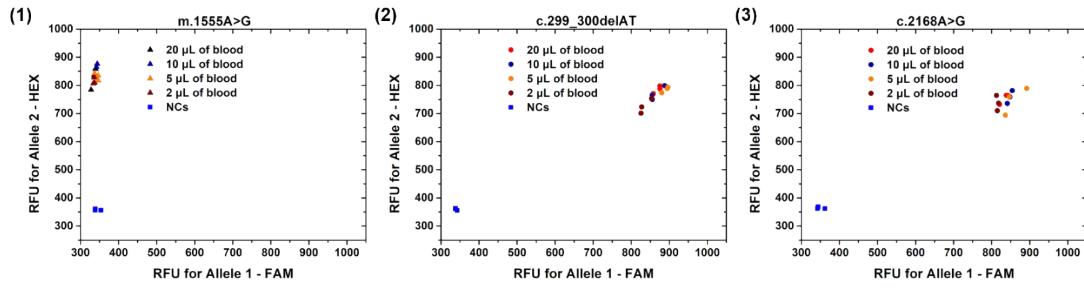

65

66 **Figure S4.** Detection results of 13 clinical samples using our cassette system. All the samples

67 were tested in triplicate.

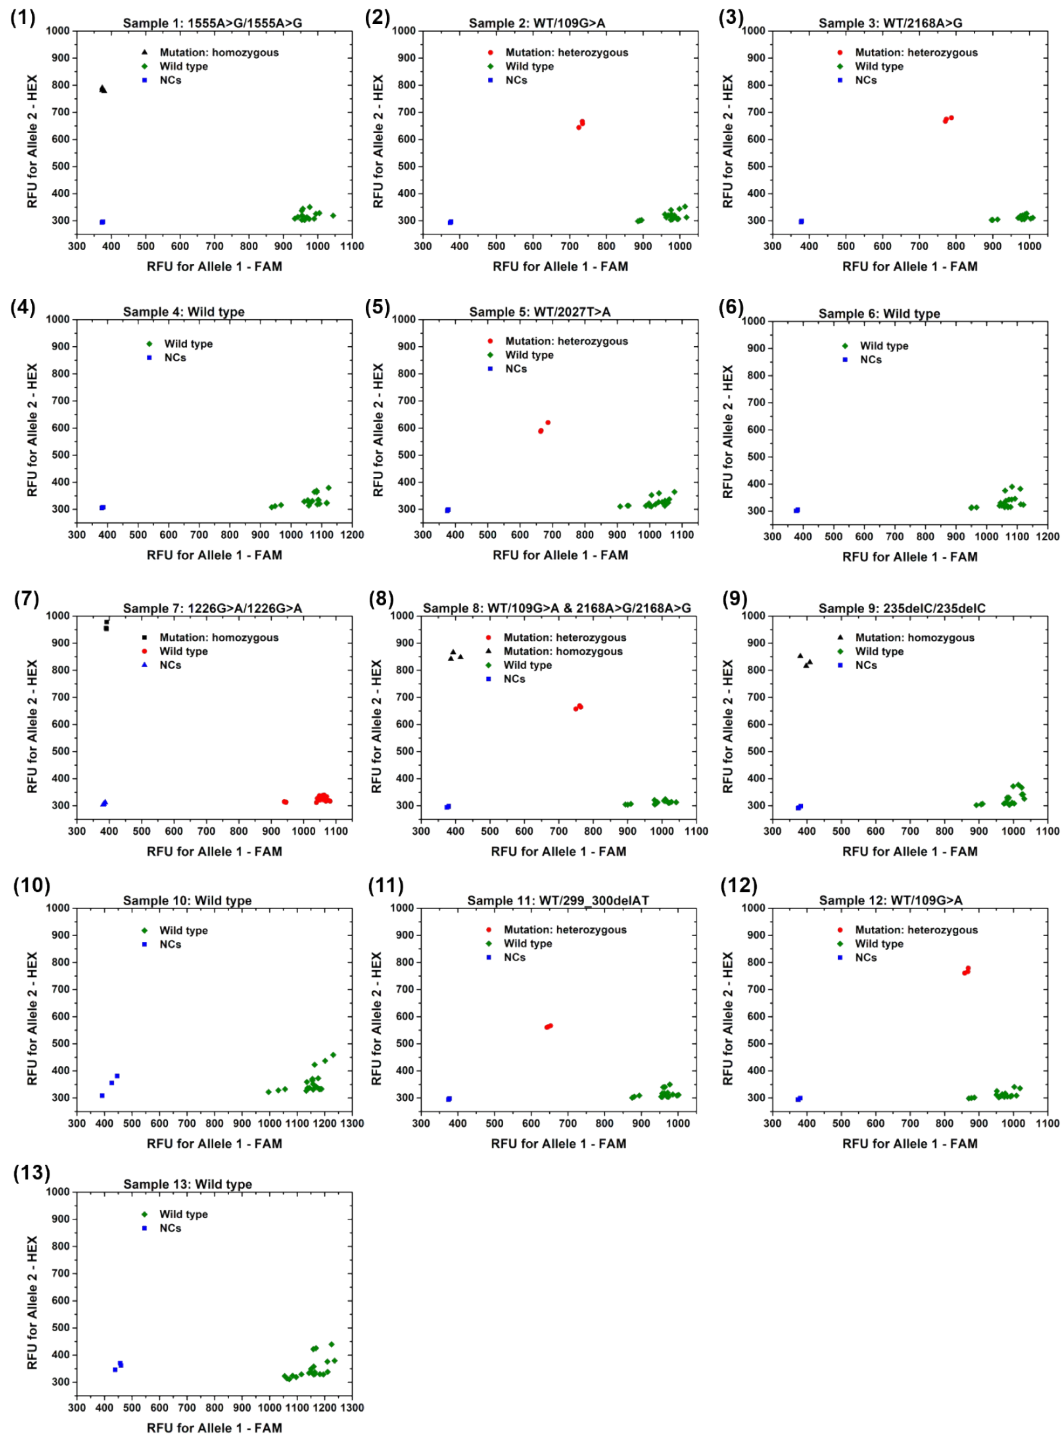

68

69 **Figure S5.** Sanger sequencing results of 13 clinical samples. The mutation sites are circled by

70 a red box.

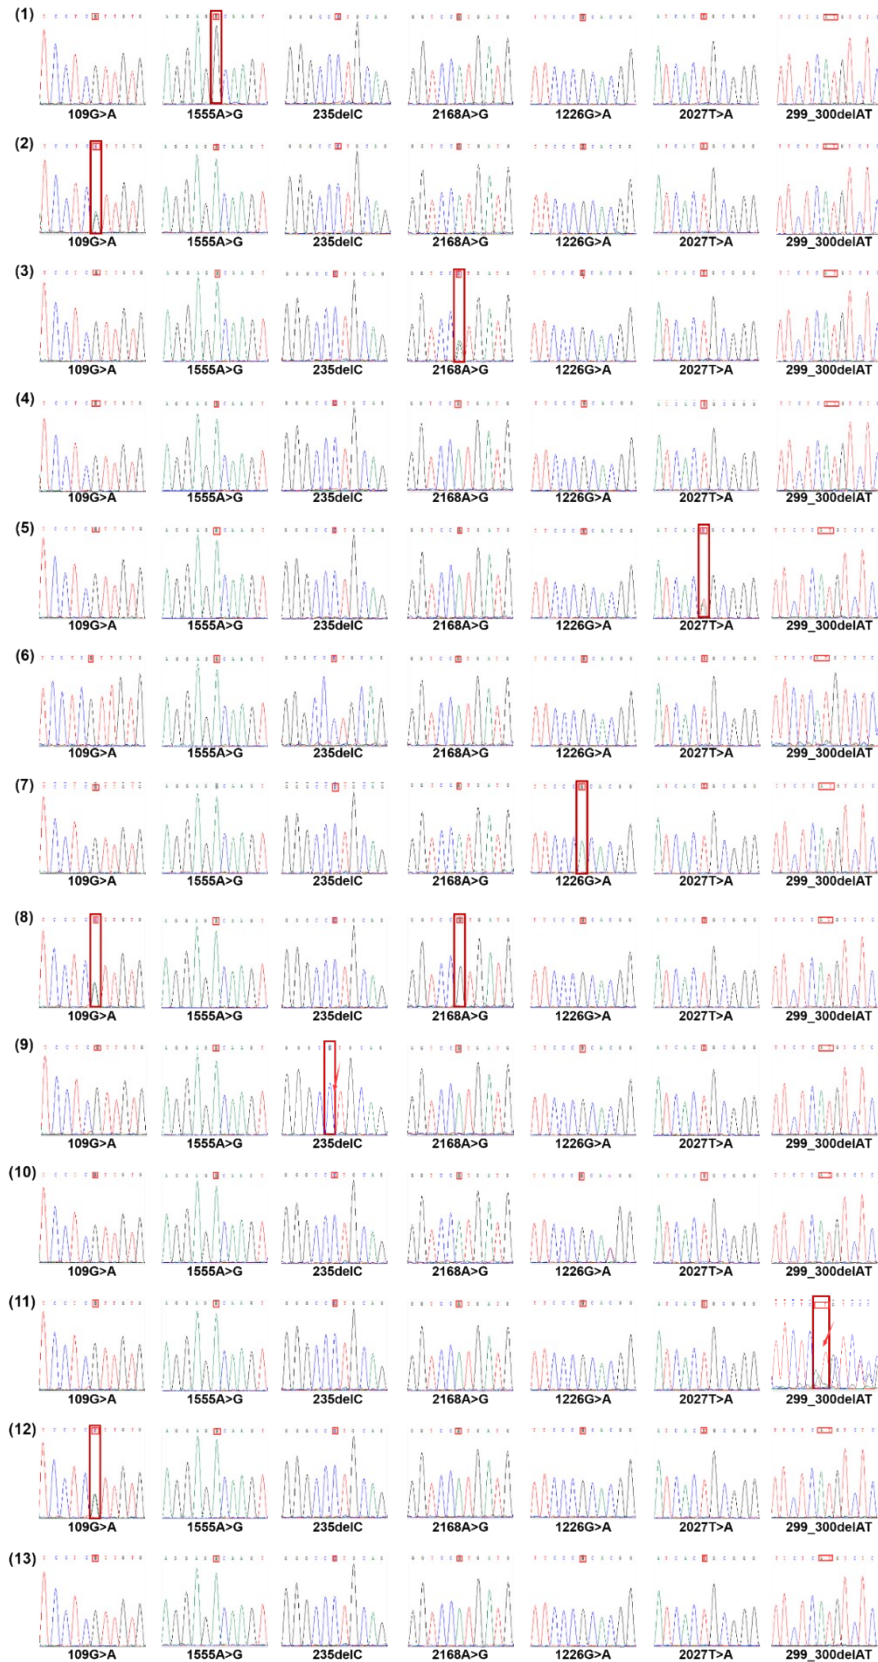

72 **Table S1.** Basic information of 13 clinical samples.

| <b>Clinical samples</b> | <b>Gender</b> | <b>Age</b> | <b>Hearing condition</b> |
|-------------------------|---------------|------------|--------------------------|
| 1                       | Female        | 25         | Deafness                 |
| 2                       | Female        | 41         | Healthy                  |
| 3                       | Male          | 36         | Poor hearing             |
| 4                       | Female        | 19         | Healthy                  |
| 5                       | Female        | 6          | Deafness                 |
| 6                       | Male          | 23         | Healthy                  |
| 7                       | Male          | 20         | Healthy                  |
| 8                       | Male          | 25         | Deafness                 |
| 9                       | Male          | 37         | Deafness                 |
| 10                      | Female        | 32         | Healthy                  |
| 11                      | Male          | 30         | Healthy                  |
| 12                      | Female        | 29         | Healthy                  |
| 13                      | Female        | 26         | Healthy                  |

73



74 **Table S2.** Sequences of cloning primers of 7 SNPs/InDels.

| Gene           | Detection site     | RS ID       | Sequence of the primers (5'-3')                    |
|----------------|--------------------|-------------|----------------------------------------------------|
| <i>MT-RNR1</i> | m.1555A>G          | rs267606617 | F: GAAGGTGGATTTAGCAGTAA<br>R: GGGTAAATGGTTTGGCTAAG |
|                | c.109G>A           | rs72474224  | F: ACACGAAGATCAGCTGCAGG<br>R: CTGTCCTAGCTAGTGATTCC |
| <i>GJB2</i>    | c.235delC          | rs80338943  | F: GCCTTCGATGCGGACCTTCT<br>R: ACAAACACTCCACCAGCATT |
|                | c.299_300delA<br>T | rs111033204 | F: GCCTTCGATGCGGACCTTCT<br>R: ACAAACACTCCACCAGCATT |
| <i>SLC26A4</i> | c.2168A>G          | rs121908362 | F: CCTAGCTAATTGGGAGGG<br>R: TGAGGCTCCATGAAGTTA     |
|                | c.2027T>A          | rs111033318 | F: TGACAGTGTTTTCTTCGTTT<br>R: AAGCCCATGTATTTGCCCTG |
|                | c.1226G>A          | rs111033305 | F: GCGTCCAAACTCCTGATGTC<br>R: GAATAGGCCTGAGGTGAATC |

75 “RS ID” represents the reference SNP identification number, “F” represents the forward

76 primer, “R” represents the reverse primer, “m.” stands for mitochondrial mutation and “c.”

77 stands for chromosome mutation.

78 **Table S3.** Specificity of on-cassette tests for the detection of seven SNPs/InDels.

79

| Sample<br>genotype      | Primers preloaded in reaction chambers |          |           |                |           |           |           | NC |
|-------------------------|----------------------------------------|----------|-----------|----------------|-----------|-----------|-----------|----|
|                         | m.1555A>G                              | c.109G>A | c.235delC | c.299_300delAT | c.2168A>G | c.2027T>A | c.1226G>A |    |
| m.1555A>G/<br>m.1555A>G | △                                      | ◇        | ◇         | ◇              | ◇         | ◇         | ◇         | □  |
| WT/c.109G>A             | ◇                                      | ○        | ◇         | ◇              | ◇         | ◇         | ◇         | □  |
| WT/c.235delC            | ◇                                      | ◇        | ○         | ◇              | ◇         | ◇         | ◇         | □  |
| WT/c.299_300delAT       | ◇                                      | ◇        | ◇         | ○              | ◇         | ◇         | ◇         | □  |
| WT/c.2168A>G            | ◇                                      | ◇        | ◇         | ◇              | ○         | ◇         | ◇         | □  |
| WT/c.2027T>A            | ◇                                      | ◇        | ◇         | ◇              | ◇         | ○         | ◇         | □  |
| c.1226G>A/<br>c.1226G>A | ◇                                      | ◇        | ◇         | ◇              | ◇         | ◇         | △         | □  |

80 Note: “△” indicates genotype with homozygous alleles, “○” indicates heterozygote, “◇” indicates

81 wild-type genotype, and “□” indicate NC.

82 **Table S4.** Sensitivity of on-cassette tests for the detection of seven SNPs/InDels.

83

| ID | Sample genotype     | The amount of whole blood samples |            |           |           |
|----|---------------------|-----------------------------------|------------|-----------|-----------|
|    |                     | 20 $\mu$ L                        | 10 $\mu$ L | 5 $\mu$ L | 2 $\mu$ L |
| 1  | m.1555A>G/m.1555A>G | √                                 | √          | √         | √         |
| 2  | WT/c.109G>A         | √                                 | √          | √         | √         |
| 3  | WT/c.235delC        | √                                 | √          | √         | √         |
| 4  | WT/c.299_300delAT   | √                                 | √          | √         | √         |
| 5  | WT/c.2168A>G        | √                                 | √          | √         | ×         |
| 6  | WT/c.2027T>A        | √                                 | √          | √         | ×         |
| 7  | c.1226G>A/c.1226G>A | √                                 | √          | √         | ×         |
| 8  | m.1555A>G/m.1555A>G | √                                 | √          | √         | √         |
| 9  | WT/c.299_300delAT   | √                                 | √          | √         | √         |
| 10 | WT/c.2168A>G        | √                                 | √          | √         | √         |

84 Note: “√” indicates the successful amplification fit the criteria for genotyping results, “×” indicates

85 the failure amplification that could not fit the criteria for genotyping results.

86 **Video S1.** Automated processing on the cassette system for SNP/InDel genotyping. The video  
87 shows the workflow of on-cassette magnetic bead-based nucleic acid extraction, distribution of  
88 the reaction mixture into eight chambers, thermal sealing of chambers, PCR thermal cycling  
89 and dual-channel fluorescence detection steps, and the sample and reagents are represented by  
90 different coloured dyes.
